# Supplementary figures and images for: Restructuring of mesoporous silica: high quality large crystal MCM‐41 via a seeded recrystallisation route
Source: Royal Society of Chemistry journal article supplement (doi:10.1039/b000179l), 2000-01-01

(a)


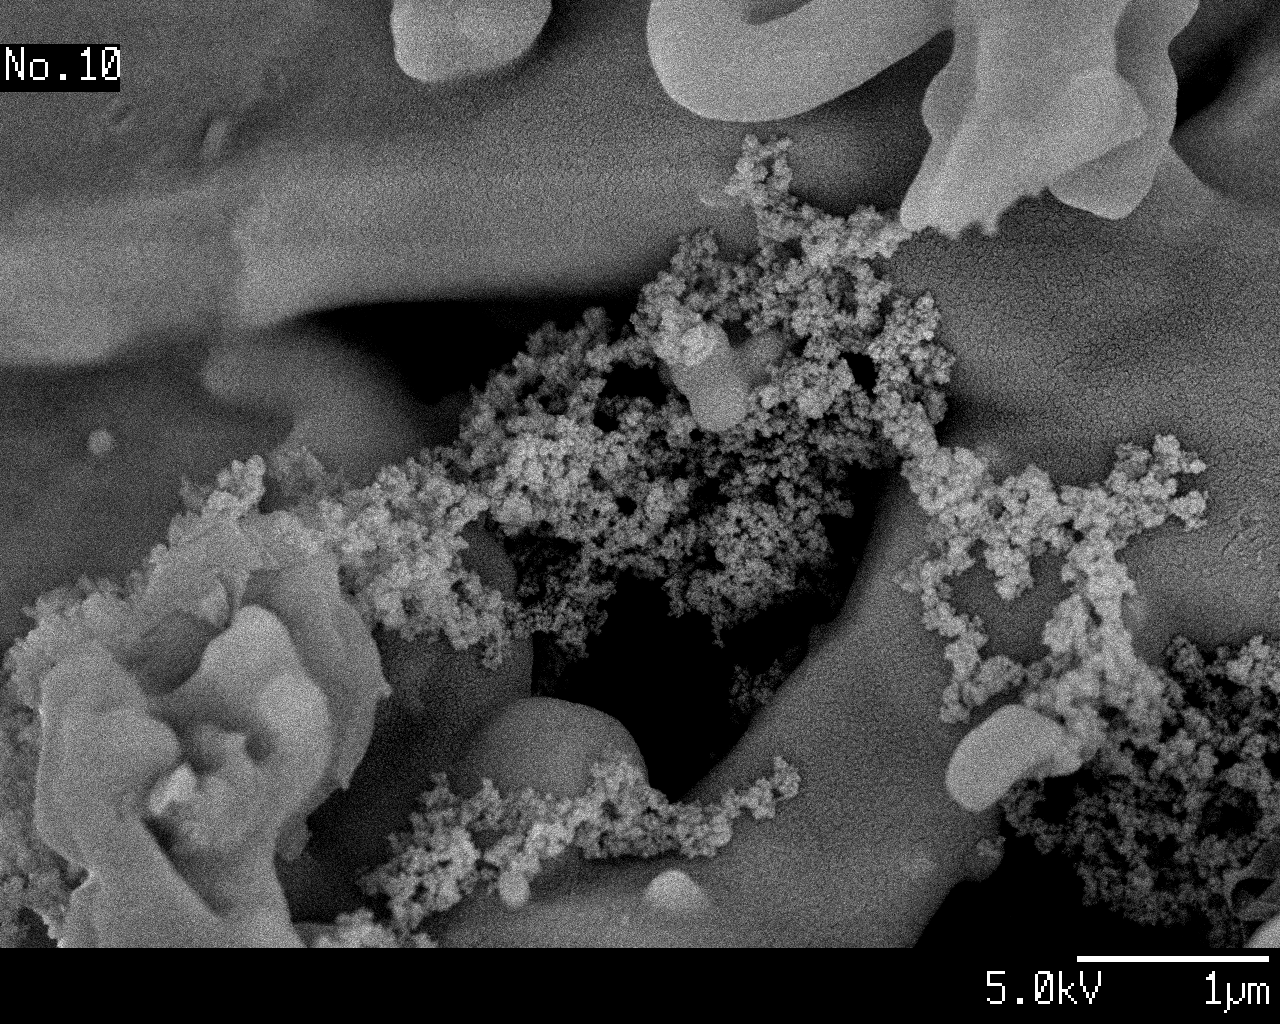


(b)


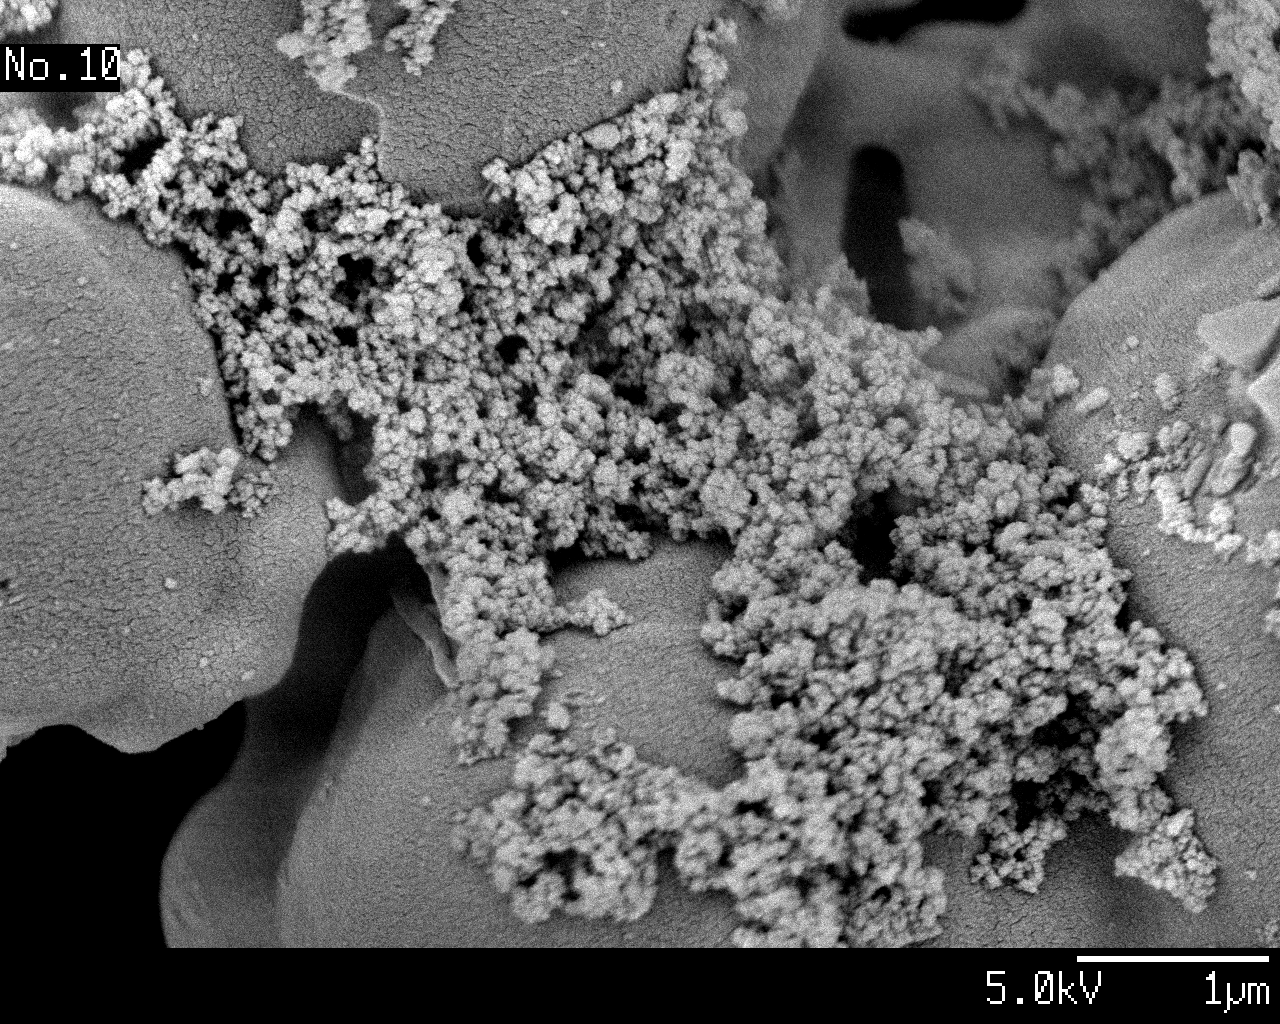

Supplement: b000179lab.doc [file b000179lab.doc]

(e)


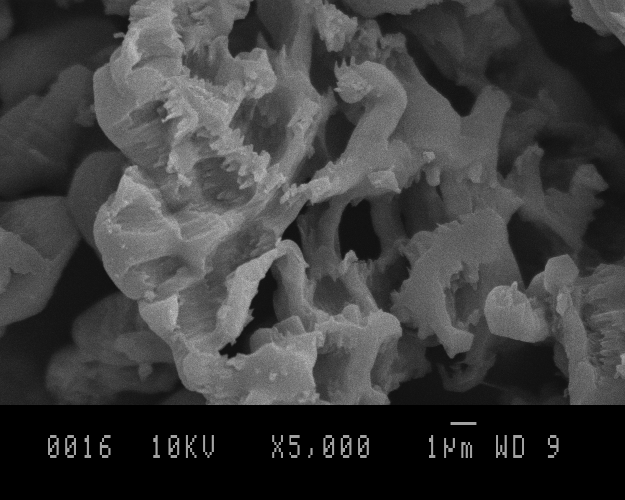

Supplement: b000179le.doc [file b000179le.doc]
